# Supplementary material
Source: PubMed Central journal article supplement (PMC5753868)
Supplement: 349FigureS1.pdf [file 349FigureS1.pdf]

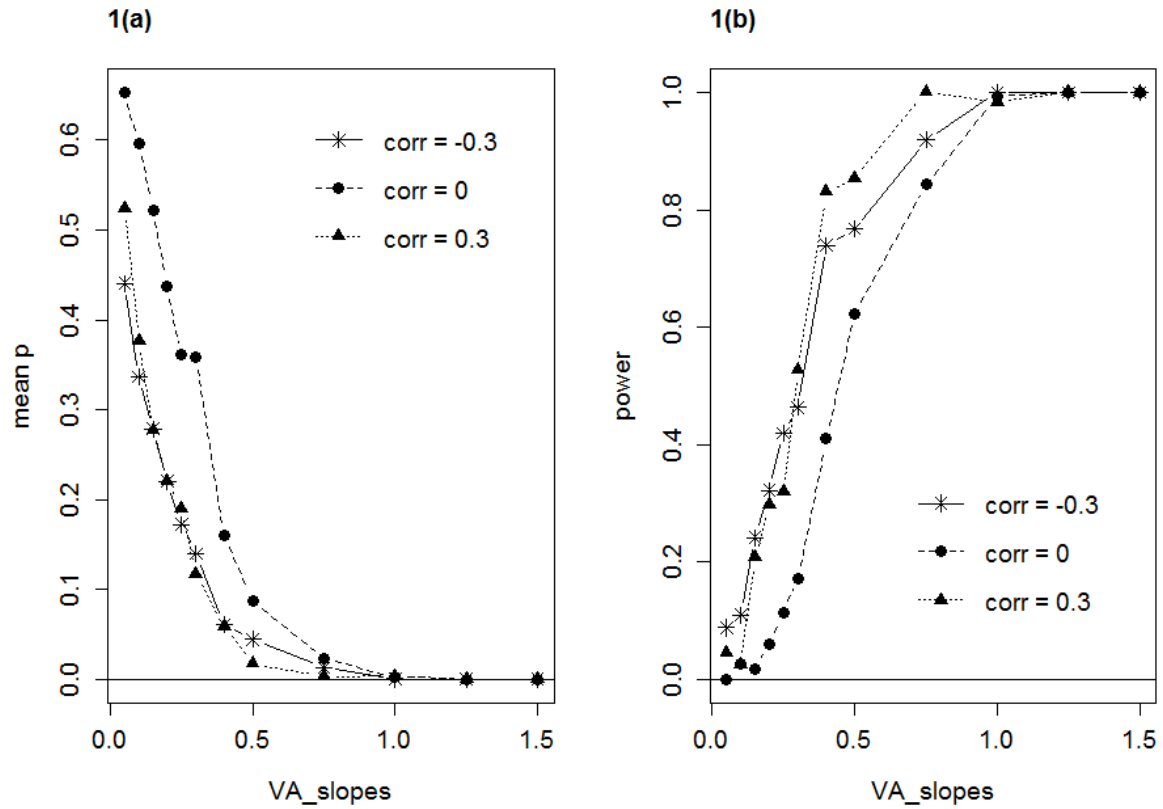

**Figure S1.** Power simulation results. (A) Mean P-value and (B) the proportion of times that  $P < 0.05$  (i.e. the statistical power) from tests for G\*E across data sets simulated with different values of  $V_{A(\text{slopes})}$  and  $\text{Cov}_{A(\text{int-slopes})}$ .  $V_{A(\text{slopes})}$  are shown on the x-axis, and  $\text{Cov}_{A(\text{int-slopes})}$  was set such as to generate a correlation of either -0.3 (stars), 0 (filled circles) or +0.3 (triangles) between intercepts and slopes.
