# Supplementary material
Source: PubMed Central journal article supplement (PMC5753868)
Supplement: 349FigureS2.pdf [file 349FigureS2.pdf]

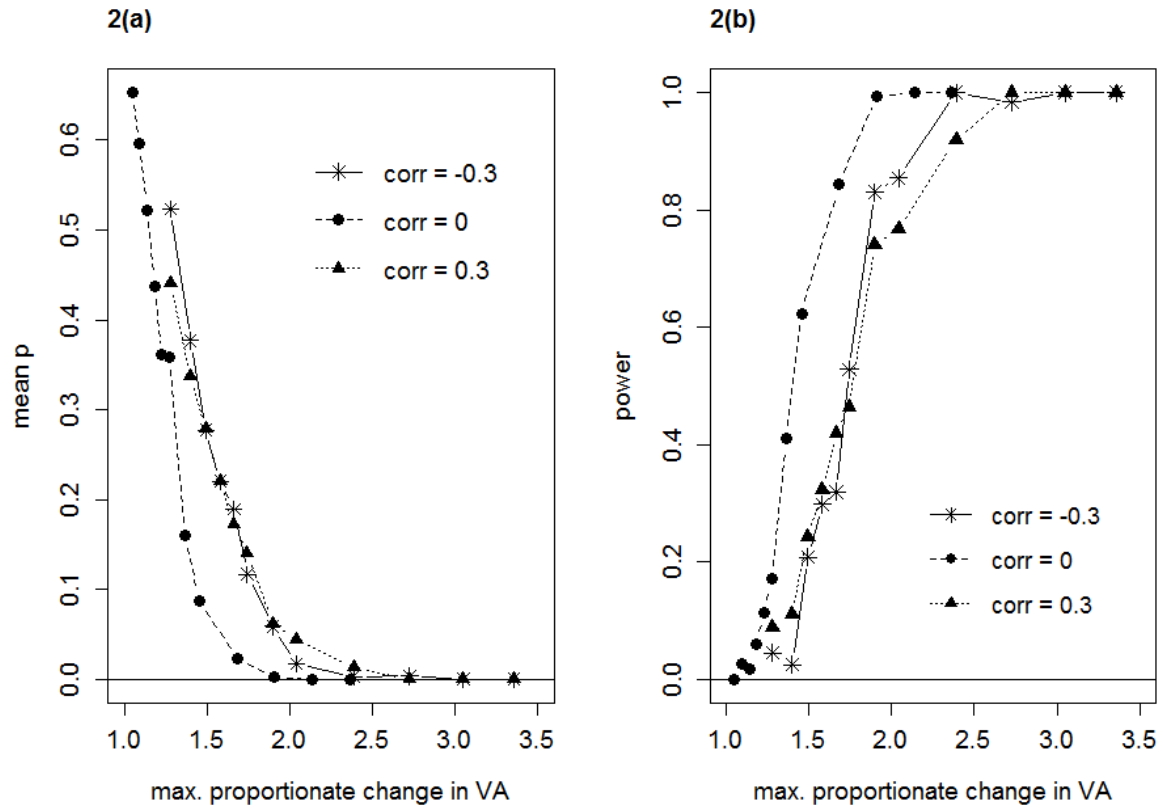

**Figure S2.** Maximum proportionate change in  $V_A$  across the range of environmental values induced by simulations of the different levels of  $V_A$ (slopes) shown in Figure 1, and their association with (A) mean p-values and (B) power to detect G\*E.
