# Supplementary material
Source: PubMed Central journal article supplement (PMC5753868)
Supplement: 349FigureS3.pdf [file 349FigureS3.pdf]

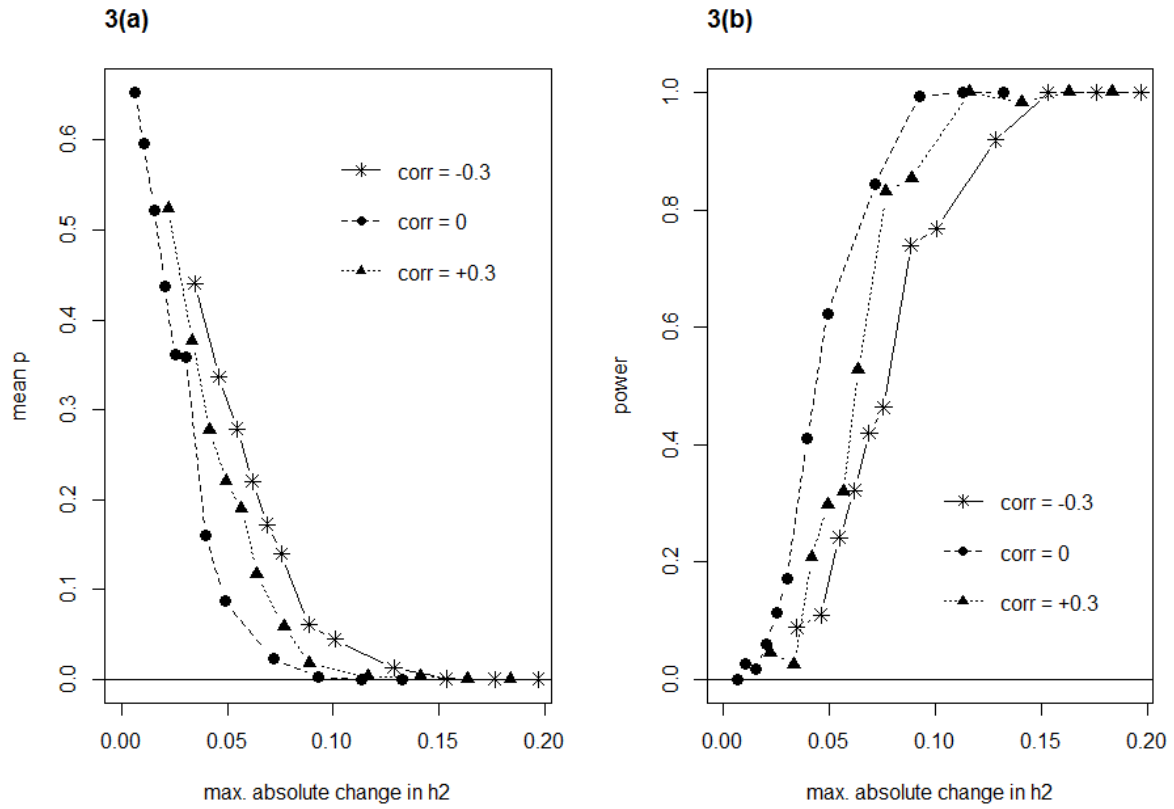

**Figure S3.** Maximum absolute change in heritability across the range of environmental values induced by simulations of the different levels of  $V_{A(\text{slopes})}$  shown in Figure 1, and their association with (A) mean p-values and (B) power to detect G\*E.
